# Supplementary material for: Evaluating the Feasibility and Impact of a Yoga Intervention on Cognition, Physical Function, Physical Activity, and Affective Outcomes in People Living With HIV: Protocol for a Randomized Pilot Trial
Source: PubMed Central journal article supplement (PMC6547772; doi:10.2196/13818), 2019-05-21
Supplement: resprot_v8i5e13818_app1.pdf [file resprot_v8i5e13818_app1.pdf]

## EXERCISE SESSIONS

Please check the box (✓) that indicates your level of agreement with each of the following statements.

**Safety:** I felt safe during the exercise sessions.

Strongly disagree     Disagree     Neutral     Agree     Strongly agree

Comments:

**Fatigue:** I felt fatigued by the end of each exercise session.

Strongly disagree     Disagree     Neutral     Agree     Strongly agree

Comments:

**Comfort:** I felt comfortable during the exercise sessions.

Strongly disagree     Disagree     Neutral     Agree     Strongly agree

Comments:

**Progression:** The difficulty of the exercise sessions over the 24-week study was increased appropriately.

Strongly disagree     Disagree     Neutral     Agree     Strongly agree

Comments:

**Enjoyment:** I enjoyed the exercise sessions.

Strongly disagree     Disagree     Neutral     Agree     Strongly agree

Comments:

**Motivation:** I was motivated to work hard during the exercise sessions.

Strongly disagree     Disagree     Neutral     Agree     Strongly agree

Comments:

**Benefits:** In the end, I feel the exercise sessions were beneficial.

Strongly disagree     Disagree     Neutral     Agree     Strongly agree

Comments:

## **GENERAL QUESTIONS ABOUT THE PROJECT**

**1. Have you noticed anything in your day-to-day life that you feel has been affected by participating in this project?**

**2. Is there anything that you feel has been particularly helpful about having participated in this project?**

**3. Is there anything that has been disappointing about participating in this project?**

**4. Have you noticed any changes in your thinking ability since participating in this project? If so, describe the change(s)?**

**5. Have you noticed any changes in the quality or length of your sleep since participating in this project? If so, describe the change(s)?**

**6. Any additional comments?**
